# Supplementary material for: Efficacy and safety of thiazolidinediones in diabetes patients with renal impairment: a systematic review and meta-analysis
Source: PubMed Central journal article supplement (PMC5431943; doi:10.1038/s41598-017-01965-0), 2017-05-11
Supplement: 41598_2017_1965_MOESM1_ESM.pdf [file 41598_2017_1965_MOESM1_ESM.pdf]

# Efficacy and safety of thiazolidinediones in diabetes patients with renal impairment: a systematic review and meta-analysis

## Short running title: Thiazolidinediones for diabetes patients with renal impairment

### Authors

Wen Wang, MD, *Ph.D. candidate*<sup>a</sup>, Xu Zhou, *Ph.D.*<sup>a,d</sup>, Joey S.W. Kwong, *Ph.D.*<sup>a,b</sup>, Ling Li, *Ph.D. candidate*<sup>a,b</sup>, Youping Li, *M.D.*<sup>a,b</sup>, Xin Sun, *Ph.D.*<sup>a,b,c</sup>

### Supplementary text1 Search strategy

#### PubMed

|    |                                    |    |                                     |
|----|------------------------------------|----|-------------------------------------|
| 1  | "Diabetic Nephropathies" [MH]      | 33 | tubulointerstitial fibrosis[tw]     |
| 2  | "Kidney Diseases, Cystic"[MH]      | 34 | endstage kidney disease*[tw]        |
| 3  | Nephritis[MH]                      | 35 | end stage kidney disease*[tw]       |
| 4  | "Renal Insufficiency, Chronic"[MH] | 36 | dialysis*[tw]                       |
| 5  | "Renal Dialysis"[MH]               | 37 | hemodia*[tw]                        |
| 6  | Uremia[MH]                         | 38 | haemodia*[tw]                       |
| 7  | Renal Insufficiency"[MH]           | 39 | hemofiltration*[tw]                 |
| 8  | chronic kidney[tw]                 | 40 | haemofiltration*[tw]                |
| 9  | chronic renal[tw]                  | 41 | hemodiafiltration*[tw]              |
| 10 | progressive kidney[tw]             | 42 | haemodiafiltration*[tw]             |
| 11 | diabetic kidney[tw]                | 43 | tenckhoff[tw]                       |
| 12 | diabetic renal[tw]                 | 44 | proteinuri*[tw]                     |
| 13 | kidney disease*[tw]                | 45 | microalbuminuri*[tw]                |
| 14 | kidney impair*[tw]                 | 46 | macroalbuminuri*[tw]                |
| 15 | kidney failur*[tw]                 | 47 | albuminuri*[tw]                     |
| 16 | kidney function*                   | 48 | hypoalbuminemi*[tw]                 |
| 17 | kidney insufficiency[tw]           | 49 | hypoalbuminaemi*[tw]                |
| 18 | kidney disorder*[tw]               | 50 | glomerulopath*[tw]                  |
| 19 | kidney dysfunction[tw]             | 51 | alport[tw]                          |
| 20 | renal disease*[tw]                 | 52 | denys-drash[tw]                     |
| 21 | renal impair*[tw]                  | 53 | uremi*[tw]                          |
| 22 | renal failur*[tw]                  | 54 | uraemi*[tw]                         |
| 23 | renal function*[tw]                | 55 | multicystic kidney[tw]              |
| 24 | renal insufficiency[tw]            | 56 | polycystic kidney[tw]               |
| 25 | renal disorder*[tw]                | 57 | cystic kidney[tw]                   |
| 26 | renal dysfunction[tw]              | 58 | nephritis*[tw]                      |
| 27 | glomerular disease*[tw]            | 59 | nephrop*[tw]                        |
| 28 | glomerular disorder*[tw]           | 60 | nephrotic syndrome[tw]              |
| 29 | glomerular dysfunction[tw]         | 61 | 1 OR 2 OR 3 OR 4 OR 5 OR 6 OR 7 OR  |
| 30 | kidney fibrosis[tw]                |    | 8 OR 9 OR 10 OR 11 OR 12 OR 13 OR   |
| 31 | renal fibrosis[tw]                 |    | 14 OR 15 OR 16 OR 17 OR 18 OR 19 OR |
| 32 | glomerular fibrosis[tw]            |    | 20 OR 21 OR 22 OR 23 OR 24 OR 25    |

62 OR 26 OR 27 OR 28 OR 29 OR 30 OR  
31 OR 32 OR 33 OR 34 OR 35 OR 36  
OR 37 OR 38 OR 39 OR 40 OR 41 OR  
42 OR 43 OR 44 OR 45 OR 46 OR 47  
OR 48 OR 49 OR 50 OR 51 OR 52 OR  
53 OR 54 OR 55 OR 56 OR 57 OR 58  
OR 59 OR 60  
63 "Hypoglycemic Agents"[mh]  
64 Thiazolidinediones[mh]  
65 Thiazolidinedione\*[tw]  
66 rosiglitazone[tw]  
67 pioglitazone[tw]  
68 peroxisome proliferator-activated  
receptor agonist\*[tw]  
69 ppar agonist\*.tw.  
70 62 OR 63 OR 64 OR 65 OR 66 OR 67  
OR 68  
71 Randomized controlled trial[pt]  
72 Controlled clinical trial[pt]  
73 comparative study[pt]  
74 "Clinical Trials as Topic"[mh]  
75 "case-control studies"[mh]  
76 "Cohort Studies"[mh]  
77 "Longitudinal Studies"[mh]  
78 "retrospective studies"[mh]  
79 "Follow-Up Studies"[mh]  
80 "prospective studies"[mh]  
81 "Registries"[mh]  
82 Random\*[tiab]  
83 nonrandom\*[tiab]  
84 non random\*[tiab]  
85 trial[tiab]  
86 trials[tiab]  
87 longitudinal\*[tiab]  
88 prospective\*[tiab]  
89 retrospective\*[tiab]  
90 incidence stud\*[tiab]  
91 concurrent stud\*[tiab]  
92 group\*[tiab]  
93 database\*[tiab]  
94 population\*[tiab]  
95 registr\*[tiab]  
96 70 OR 71 OR 72 OR 73 OR 74 OR 75 OR  
76 OR 77 OR 78 OR 79 OR 80 OR 81 OR  
82 OR 83 OR 84 OR 85 OR 86 OR 87 OR  
88 OR 89 OR 90 OR 91 OR 92 OR 93 OR  
94  
97 English[la]  
98 61 AND 69 AND 95 AND 96  
99 "Review Literature as Topic"[MH]  
100 "Meta-Analysis as Topic"[MH]  
101 "Meta-Analysis"[pt]  
102 review[pt]  
103 comment[pt]  
104 letter[pt]  
105 editorial[pt]  
106 meta analy\*[tw]  
107 Metaanaly\*[tw]  
108 systematic review\*[tw]  
109 98 OR 99 OR 100 OR 101 OR 102 OR  
103 OR 104 OR 105 OR 106 OR 107  
110 97 NOT 108  
111 animal[mh]  
112 humans[mh]  
113 110 NOT 111  
114 109 NOT 112

***Embase and CENTRAL (via OVID)***

- 1 exp chronic kidney disease/
- 2 exp chronic kidney failure/
- 3 chronic kidney.tw.
- 4 chronic renal.tw.
- 5 progressive kidney.tw.
- 6 diabetic kidney.tw.
- 7 diabetic renal.tw.
- 8 kidney disease\*.tw.
- 9 kidney impair\*.tw.
- 10 kidney failur\*.tw.
- 11 kidney function\*.tw.
- 12 kidney insufficiency.tw.
- 13 kidney disorder\*.tw.
- 14 kidney dysfunction.tw.
- 15 renal disease\*.tw.
- 16 renal impair\*.tw.
- 17 renal failur\*.tw.
- 18 renal function\*.tw.
- 19 renal insufficiency.tw.
- 20 renal disorder\*.tw.
- 21 renal dysfunction.tw.
- 22 glomerular disease\*.tw.
- 23 glomerular disorder\*.tw.
- 24 glomerular dysfunction.tw.
- 25 kidney fibrosis.tw.
- 26 renal fibrosis.tw.
- 27 glomerular fibrosis.tw.
- 28 tubulointerstitial fibrosis.tw.
- 29 endstage kidney disease\*.tw.
- 30 end stage kidney disease\*.tw.
- 31 dialysis\*.tw.
- 32 hemodia\*.tw.
- 33 haemodia\*.tw.
- 34 hemofiltration\*.tw.
- 35 haemofiltration\*.tw.
- 36 hemodiafiltration\*.tw.
- 37 haemodiafiltration\*.tw.
- 38 tenckhoff.tw.
- 39 proteinuri\*.tw.
- 40 microalbuminuri\*.tw.
- 41 macroalbuminuri\*.tw.
- 42 albuminuri\*.tw.
- 43 hypoalbuminemi\*.tw.
- 44 hypoalbuminaemi\*.tw.
- 45 glomerulopath\*.tw.
- 46 alport.tw.
- 47 denys-drash.tw.
- 48 uremi\*.tw.
- 49 uraemi\*.tw.
- 50 multicystic kidney.tw.
- 51 polycystic kidney.tw.
- 52 cystic kidney.tw.
- 53 nephritis\*.tw.
- 54 nephrop\*.tw.
- 55 nephrotic syndrome.tw.
- 56 1 OR 2 OR 3 OR 4 OR 5 OR 6 OR 7 OR 8 OR 9 OR 10 OR 11 OR 12 OR 13 OR 14 OR 15 OR 16 OR 17 OR 18 OR 19 OR 20 OR 21 OR 22 OR 23 OR 24 OR 25 OR 26 OR 27 OR 28 OR 29 OR 30 OR 31 OR 32 OR 33 OR 34 OR 35 OR 36 OR 37 OR 38 OR 39 OR 40 OR 41 OR 42 OR 43 OR 44 OR 45 OR 46 OR 47 OR 48 OR 49 OR 50 OR 51 OR 52 OR 53 OR 54 OR 55
- 57 exp antidiabetic agent/
- 58 Thiazolidinedione\*.tw.
- 59 rosiglitazone.tw.
- 60 pioglitazone.tw.
- 61 peroxisome proliferator-activated receptor agonist\*.tw.
- 62 ppar agonist\*.tw.
- 63 57 OR 58 OR 59 OR 60 OR 61 OR 62
- 64 clinical trials as topic/
- 65 controlled clinical trials as topic/
- 66 randomized controlled trials as topic/
- 67 case-control studies/
- 68 cohort studies/
- 69 longitudinal studies/
- 70 retrospective studies/
- 71 follow-up studies/
- 72 prospective studies/
- 73 registries/
- 74 random\*.ti,ab nonrandom\*.ti,ab.

75 non random\*.ti,ab.  
76 trial.ti,ab.  
77 trials.ti,ab.  
78 cohort\*.ti,ab.  
79 case control\*.ti,ab.  
80 case control\*.ti,ab.  
81 follow up\*.ti,ab.  
82 followup\*.ti,ab.  
83 longitudinal\*.ti,ab.  
84 prospective\*.ti,ab.  
85 retrospective\*.ti,ab.  
86 group\*.ti,ab.

87 database\*.ti,ab.  
88 population\*.ti,ab.  
89 registr\*.ti,ab.  
90 64 OR 65 OR 66 OR 67 OR 68 OR 69 OR  
70 OR 71 OR 72 OR 73 OR 74 OR 75 OR  
76 OR 77 OR 78 OR 79 OR 80 OR 81 OR  
82 OR 83 OR 84 OR 85 OR 86 OR 87 OR  
88 OR 89  
91 limit 90 to english language  
92 limit 91 to human [Limit not valid in  
CANTRAL; records were retained]

## Supplementary Table 1 Risk of bias of included studies

### *Risk of bias in randomized controlled trials*

Of the 19 RCTs, nine (47.4%) reported adequate random sequence generation, seven (36.8%) blinded patients and six (31.6%) blinded care givers and patients. A total of 14 (73.7%) trials followed up more than 90% patients, but only three adequately compared prognostic factors. In conclusion, these 19 RCTs were at moderate to high risk of bias, of which ten (52.6%) trials were at high risk, the remaining 9 (47.4%) trials were at moderate risk (Table 1).

Table 1 *Risk of bias of randomized controlled trials*

| Study               | Adequate randomization sequence generation | Adequate allocation concealment | Adequate blinding of patients | Adequate blinding of care givers | Blinding of outcome assessor | Free from selective reporting | Adequate follow up | Adequate comparability of prognostic factors | Qualitative of risk of bias |
|---------------------|--------------------------------------------|---------------------------------|-------------------------------|----------------------------------|------------------------------|-------------------------------|--------------------|----------------------------------------------|-----------------------------|
| Abe 2007 [19]       | Definitely yes                             | Probably no                     | Definitely no                 | Definitely no                    | Definitely no                | Definitely yes                | Definitely yes     | Probably no                                  | High risk                   |
| Abe 2008 [20]       | Probably yes                               | Probably no                     | Definitely no                 | Definitely no                    | Definitely no                | Definitely yes                | Definitely yes     | Probably no                                  | High risk                   |
| Abe 2010 [16]       | Definitely yes                             | Probably no                     | Definitely no                 | Definitely no                    | Definitely no                | Definitely yes                | Definitely yes     | Probably no                                  | High risk                   |
| Agarwal 2005 [17]   | Definitely yes                             | Definitely yes                  | Definitely no                 | Definitely no                    | Definitely no                | Definitely yes                | Definitely yes     | Definitely yes                               | Moderate risk               |
| Agrawal 2003 [21]   | Probably yes                               | Probably yes                    | Definitely yes                | Definitely yes                   | Probably yes                 | Definitely yes                | Definitely yes     | Probably no                                  | Moderate risk               |
| Arashnia 2015 [22]  | Probably yes                               | Probably yes                    | Definitely yes                | Definitely yes                   | Probably yes                 | Definitely yes                | Definitely yes     | Probably no                                  | Moderate risk               |
| Banerji 2010 [23]   | Definitely yes                             | Definitely yes                  | Definitely no                 | Definitely no                    | Definitely no                | Definitely yes                | Definitely yes     | Probably no                                  | High risk                   |
| Chan 2011 [24]      | Definitely yes                             | Probably yes                    | Definitely yes                | Definitely yes                   | Probably yes                 | Definitely yes                | Definitely yes     | Probably no                                  | Moderate risk               |
| Galle 2012 [25]     | Probably yes                               | Probably yes                    | Definitely yes                | Definitely yes                   | Probably yes                 | Definitely yes                | Probably no        | Definitely yes                               | Moderate risk               |
| Jin 2007 [26]       | Definitely yes                             | Probably yes                    | Probably no                   | Probably no                      | Probably no                  | Definitely yes                | Definitely yes     | Probably no                                  | Moderate risk               |
| Katavetin 2006 [27] | Definitely yes                             | Definitely yes                  | Definitely yes                | Definitely no                    | Probably no                  | Definitely yes                | Probably yes       | Probably no                                  | Moderate risk               |
| Morikawa 2011 [28]  | Probably yes                               | Probably yes                    | Definitely no                 | Definitely no                    | Definitely no                | Definitely yes                | Definitely yes     | Definitely yes                               | Moderate risk               |
| Nakamura 2000 [29]  | Probably yes                               | Probably yes                    | Probably no                   | Probably no                      | Probably no                  | Definitely yes                | Probably yes       | Probably no                                  | High risk                   |
| Nakamura 2001 [30]  | Probably yes                               | Probably yes                    | Definitely yes                | Definitely yes                   | Probably no                  | Definitely yes                | Probably yes       | Probably no                                  | Moderate risk               |
| Nakamura 2004 [31]  | Definitely yes                             | Definitely yes                  | Probably no                   | Probably no                      | Probably no                  | Definitely yes                | Definitely yes     | Probably no                                  | High risk                   |

|                     |                |                |                |                |               |               |                |                |             |               |
|---------------------|----------------|----------------|----------------|----------------|---------------|---------------|----------------|----------------|-------------|---------------|
| Nakamura 2006 [32]  | Probably yes   | Definitely yes | Probably no    | Probably no    | Probably no   | Probably no   | Definitely yes | Definitely yes | Probably no | High risk     |
| Pistrosch 2012 [33] | Probably yes   | Probably yes   | Definitely yes | Definitely yes | Probably yes  | Probably yes  | Definitely yes | Probably yes   | Probably no | Moderate risk |
| Wong 2005 [34]      | Definitely yes | Definitely yes | Definitely no  | Definitely no  | Definitely no | Definitely no | Definitely yes | Definitely yes | Probably no | High risk     |
| Yanagawa 2004 [35]  | Probably yes   | Probably no    | Probably no    | Probably no    | Probably no   | Probably no   | Definitely yes | Definitely yes | Probably no | High risk     |

### ***Risk of bias in cohort studies***

Of the three observational studies, all studies selected exposure and control from same source, and all studies had confident in ascertaining exposure and control. Two studies conduct well adjustment for prognostic factors between exposure and control cohort. In conclusion, one study was at low risk of bias, one were at moderate risk and another one was at high risk (Table 2).

Table 2 *Risk of bias of cohort studies*

| Author             | Selection from same population | Ascertainment of exposure                                            | Ascertainment of control                                             | Outcome of interest was not present at baseline | Adequate comparability of prognostic factors                                                                                                                                                  | Assessment of prognostic factors                | Ascertainment of outcomes                       | Adequate follow up                  | Similar co-interventions | Qualitative of risk of bias |
|--------------------|--------------------------------|----------------------------------------------------------------------|----------------------------------------------------------------------|-------------------------------------------------|-----------------------------------------------------------------------------------------------------------------------------------------------------------------------------------------------|-------------------------------------------------|-------------------------------------------------|-------------------------------------|--------------------------|-----------------------------|
| Brunelli 2009 [14] | Definitely yes                 | Definitely yes<br>Drug prescription in the routine clinical practice | Definitely yes<br>Drug prescription in the routine clinical practice | Definitely yes                                  | Definitely yes<br>Cox proportional hazards models adjusted age, race, sex, body mass index, facility standardized mortality ratio                                                             | Definitely yes<br>From electronic health record | Definitely yes<br>From electronic health record | Probably no<br>Retrospective cohort | Probably no              | Moderate risk               |
| Chen YH 2015 [36]  | Definitely yes                 | Definitely yes<br>Drug prescription in the routine clinical practice | Definitely yes<br>Drug prescription in the routine clinical practice | Definitely yes                                  | Definitely no                                                                                                                                                                                 | Definitely yes<br>From electronic health record | Definitely yes<br>From electronic health record | Probably no<br>Retrospective cohort | Probably no              | High risk                   |
| Ramirez2009 [15]   | Definitely yes                 | Definitely yes<br>From a prospective cohort                          | Definitely yes<br>From a prospective cohort                          | Definitely yes                                  | Definitely yes<br>Adjustments included the two TZD types and insulin; age, gender, race BMI, years with ESRD, comorbid conditions, hemoglobin, serum glucose, total cholesterol concentration | Probably yes                                    | Definitely yes<br>From a prospective cohort     | Probably yes                        | Probably yes             | Low risk                    |

### Supplementary Table 3 Subgroup analyses of HbA1c, FPG, serum lipids and edema

Table 3 Subgroup analyses of HbA1c, FPG, serum lipids and edema

| Outcomes                      | No. of Studies<br>(patients) | Effect estimate<br>(95% CI) | P value of test for<br>overall effect | I <sup>2</sup> | P value of<br>interaction |
|-------------------------------|------------------------------|-----------------------------|---------------------------------------|----------------|---------------------------|
| <b>HbA1c</b>                  |                              |                             |                                       |                |                           |
| <b>Different degree of RI</b> |                              |                             |                                       |                |                           |
| Non-ESRD                      | 10 (623)                     | -0.57 (-1.05, -0.08)        | 0.02                                  | 73%            | 0.68                      |
| ESRD                          | 5 (222)                      | -0.69 (-1.04, -0.35)        | <0.0001                               | 55%            |                           |
| <b>Different TZDs</b>         |                              |                             |                                       |                |                           |
| Pioglitazone                  | 12 (476)                     | -0.64 (-0.97, -0.31)        | 0.0001                                | 62%            | 0.97                      |
| Rosiglitazone                 | 3 (369)                      | -0.62 (-1.51, 0.27)         | 0.17                                  | 83%            |                           |
| <b>Different control</b>      |                              |                             |                                       |                |                           |
| Placebo/no additional drugs   | 9 (607)                      | -0.90 (-1.24, -0.56)        | <0.00001                              | 73%            | 0.003                     |
| Active drugs                  | 6 (238)                      | -0.16 (-0.50, 0.18)         | 0.36                                  | 0%             |                           |
| <b>FPG</b>                    |                              |                             |                                       |                |                           |
| <b>Different degree of RI</b> |                              |                             |                                       |                |                           |
| Non-ESRD                      | 5 (467)                      | -25.17 (-54.66, 4.31)       | 0.09                                  | 95%            | 0.97                      |
| ESRD                          | 5 (228)                      | -20.66 (-36.77, -4.56)      | 0.01                                  | 32%            |                           |
| <b>Different TZDs</b>         |                              |                             |                                       |                |                           |
| Pioglitazone                  | 8 (336)                      | -27.17 (-50.18, -4.16)      | 0.02                                  | 84%            | 0.91                      |
| Rosiglitazone                 | 2 (359)                      | -24.23 (-68.33, 19.87)      | 0.28                                  | 97%            |                           |
| <b>Different control</b>      |                              |                             |                                       |                |                           |
| Placebo/no additional drugs   | 8 (615)                      | -32.26 (-53.13, -11.39)     | 0.002                                 | 90%            | 0.008                     |
| Active drugs                  | 2 (80)                       | 3.94 (-12.96, 20.84)        | 0.65                                  | 0%             |                           |
| <b>TG</b>                     |                              |                             |                                       |                |                           |
| <b>Different degree of RI</b> |                              |                             |                                       |                |                           |
| Non-ESRD                      | 5 (213)                      | -21.41 (-55.71, 12.88)      | 0.13                                  | 29%            | 0.83                      |
| ESRD                          | 6 (264)                      | -16.84 (-38.89, 5.21)       | 0.22                                  | 75%            |                           |
| <b>Different TZDs</b>         |                              |                             |                                       |                |                           |
| Pioglitazone                  | 8 (327)                      | -26.38 (-40.56, -12.19)     | 0.0003                                | 25%            | 0.05                      |
| Rosiglitazone                 | 3 (150)                      | 31.81 (-24.73, 88.35)       | 0.08                                  | 61%            |                           |
| <b>Different control</b>      |                              |                             |                                       |                |                           |
| Placebo/no additional drugs   | 9 (402)                      | -15.57 (-38.83, 7.70)       | 0.19                                  | 73%            | 0.84                      |
| Active drugs                  | 2 (75)                       | 0.35 (-152.80, 153.50)      | 1.00                                  | 0%             |                           |
| <b>TC</b>                     |                              |                             |                                       |                |                           |
| <b>Different degree of RI</b> |                              |                             |                                       |                |                           |
| Non-ESRD                      | 7 (311)                      | -3.07 (-12.89, 6.76)        | 0.54                                  | 29%            | 0.26                      |
| ESRD                          | 5 (206)                      | 8.09 (-8.61, 24.79)         | 0.34                                  | 44%            |                           |
| <b>Different TZDs</b>         |                              |                             |                                       |                |                           |
| Pioglitazone                  | 9 (367)                      | -7.00 (-13.77, -0.23)       | 0.04                                  | 0%             | 0.006                     |
| Rosiglitazone                 | 3 (150)                      | 13.51 (0.48, 26.54)         | 0.04                                  | 0%             |                           |
| <b>Different control</b>      |                              |                             |                                       |                |                           |
| Placebo/no additional drugs   | 9 (402)                      | 3.75 (-6.75, 14.26)         | 0.48                                  | 46%            | 0.17                      |

|                               |          |                      |         |     |      |
|-------------------------------|----------|----------------------|---------|-----|------|
| Active drugs                  | 3 (115)  | -8.32 (-21.76, 5.11) | 0.22    | 0%  |      |
| <b>LDL</b>                    |          |                      |         |     |      |
| <b>Different degree of RI</b> |          |                      |         |     |      |
| Non-ESRD                      | 2 (110)  | 9.48 (-1.35, 20.31)  | 0.09    | 0%  | 0.48 |
| ESRD                          | 3 (130)  | 1.95 (-15.86, 19.76) | 0.83    | 53% |      |
| <b>Different TZDs</b>         |          |                      |         |     |      |
| Pioglitazone                  | 3 (118)  | 8.30 (-12.82, 29.41) | 0.44    | 73% | 0.77 |
| Rosiglitazone                 | 2 (122)  | 4.66 (-6.61, 15.94)  | 0.42    | 0%  |      |
| <b>Different control</b>      |          |                      |         |     |      |
| Placebo/no additional drugs   | 4 (200)  | 2.76 (-9.96, 15.47)  | 0.67    | 55% | 0.39 |
| Active drugs                  | 1 (40)   | 12.00 (-4.93, 28.93) | 0.16    | -   |      |
| <b>HDL</b>                    |          |                      |         |     |      |
| <b>Different degree of RI</b> |          |                      |         |     |      |
| Non-ESRD                      | 4 (185)  | 3.12 (-0.52, 6.77)   | 0.09    | 6%  | 0.74 |
| ESRD                          | 6 (264)  | 4.02 (0.18, 7.87)    | 0.04    | 59% |      |
| <b>Different TZDs</b>         |          |                      |         |     |      |
| Pioglitazone                  | 8 (327)  | 4.84 (2.50, 7.18)    | <0.0001 | 22% | 0.01 |
| Rosiglitazone                 | 2 (122)  | -1.92 (-6.66, 2.82)  | 0.43    | 0%  |      |
| <b>Different control</b>      |          |                      |         |     |      |
| Placebo/no additional drugs   | 8 (374)  | 3.54 (0.47, 6.60)    | 0.02    | 47% | 0.83 |
| Active drugs                  | 2 (75)   | 4.34 (-2.51, 11.20)  | 0.21    | 56% |      |
| <b>Edema</b>                  |          |                      |         |     |      |
| <b>Different degree of RI</b> |          |                      |         |     |      |
| Non-ESRD                      | 5 (1169) | 2.94 (1.11, 7.76)    | 0.03    | 0%  | 0.98 |
| ESRD                          | 2 (103)  | 3.05 (0.33, 28.32)   | 0.33    | 0%  |      |
| <b>Different TZDs</b>         |          |                      |         |     |      |
| Pioglitazone                  | 4 (208)  | 1.67 (0.36, 7.75)    | 0.51    | 0%  | 0.67 |
| Rosiglitazone                 | 2 (371)  | 3.83 (0.64, 23.08)   | 0.14    | 0%  |      |
| TZDs                          | 1 (693)  | 4.03 (1.02, 15.95)   | 0.05    | -   |      |
| <b>Different control</b>      |          |                      |         |     |      |
| Placebo/no additional drugs   | 4 (474)  | 3.50 (0.86, 14.18)   | 0.08    | 0%  | 0.64 |
| Active drugs                  | 3 (798)  | 2.03 (0.34, 12.15)   | 0.44    | 43% |      |



**Supplement Figure 1 Risk of hypoglycemia in diabetes patients with renal impairment for the TZDs versus control groups from RCTs**

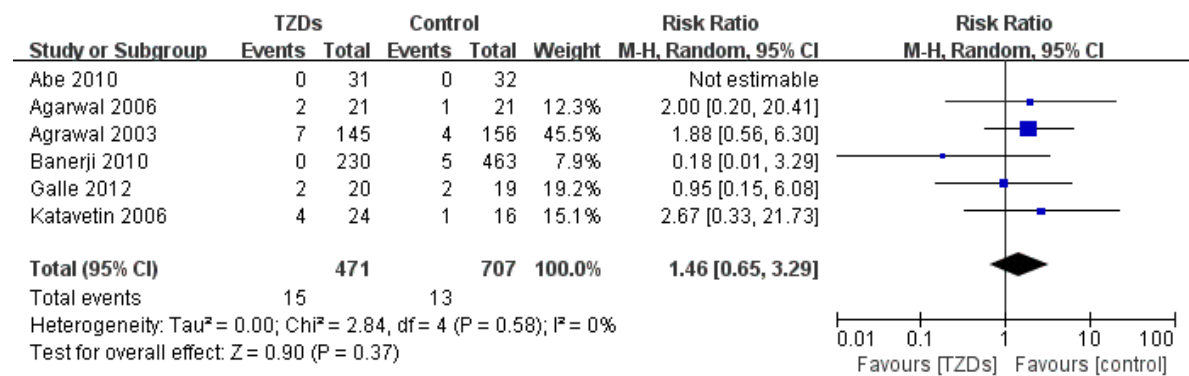

Fig 1 Risk of hypoglycemia in patients with diabetes mellitus and renal impairment for the TZDs versus control groups from RCTs
